# Supplementary material for: First example of an enantiopure planar chiral ligand built on a (η5-cyclohexadienyl)Mn(CO)3scaffold
Source: Royal Society of Chemistry journal article supplement (doi:10.1039/b817192k), 2008-11-18
Supplement: b817192k.pdf [file b817192k.pdf]

# Electronic Supporting Information

## First example of an enantiopure planar chiral ligand built on a $(\eta^5\text{-cyclohexadienyl})\text{Mn}(\text{CO})_3$ scaffold.

Derya Cetiner,<sup>[a,b]</sup> Béatrice Jacques,<sup>[a,b]</sup> Elina Payet,<sup>[a,b]</sup> Murielle Chavarot-Kerlidou,<sup>\*[a,b]</sup>  
Françoise Rose-Munch,<sup>\*[a,b]</sup> Eric Rose,<sup>[a,b]</sup> Jean-Philippe Tranchier<sup>[a,b]</sup> and Patrick Herson.<sup>[c,d]</sup>

<sup>[a]</sup> UPMC Univ Paris 06, UMR 7611, Laboratoire de Chimie Organique, Institut de Chimie Moléculaire (FR 2769), Case 181, 4 place Jussieu, F-75252 Paris Cedex 05, France.

Fax: (+33) (0)1-44-27-55-04

E-mail: [murielle.chavarot-kerlidou@upmc.fr](mailto:murielle.chavarot-kerlidou@upmc.fr), [francoise.rose@upmc.fr](mailto:francoise.rose@upmc.fr)

<sup>[b]</sup> CNRS, UMR 7611, Laboratoire de Chimie Organique, F-75005, Paris, France.

<sup>[c]</sup> UPMC Univ Paris 06, UMR 7071, Laboratoire de Chimie Inorganique et Matériaux Moléculaires, F-75005, Paris, France.

<sup>[d]</sup> CNRS, UMR 7071, Laboratoire de Chimie Inorganique et Matériaux Moléculaires, F-75005, Paris, France.

**General comments.** All reactions and manipulations were routinely performed under a dry nitrogen atmosphere using standard Schlenk techniques. Tetrahydrofuran (THF) was dried over sodium benzophenone ketyl and distilled. *N,N,N',N'*-Tetramethylethylenediamine (TMEDA) was distilled over potassium hydroxide (KOH) and stored under nitrogen over 4Å molecular sieves. Ph<sub>2</sub>PCl, Ph<sub>2</sub>(O)PCl and the palladium complex [(η<sup>3</sup>-allyl)PdCl]<sub>2</sub> were purchased from ACROS and [H<sub>2</sub>C=NMe<sub>2</sub>][I], (CH<sub>2</sub>)<sub>2</sub>I<sub>2</sub> from ALDRICH. NMR spectra were recorded on a Bruker ARX 200 MHz or Avance 400 MHz spectrometer. <sup>1</sup>H and <sup>13</sup>C signals of NMR solvent CDCl<sub>3</sub> were used as internal standards respectively at δ = 7.26 ppm and δ = 77.36 ppm. The Mn(CO)<sub>3</sub> carbonyl signal is known to be difficult to observe, specially when only low quantities of complex are available. Infrared spectra were measured on a Bruker Tensor 27 spectrometer. Elemental analyses were performed by the Service Central d'Analyse du CNRS. Mass spectra were performed for MALDI-TOF by the Plate-Forme Spectrométrie de Masse et Protéomique (IFR83, UPMC), for ES-MS by the Groupe de Spectrométrie de Masse (UMR 7613, UPMC) and for the EI-MS by the Service de Spectrométrie de Masse de l'ENS (Chemistry Dpt, Paris).

Complexes **1**<sup>[10]</sup> and (*S*)-**8**<sup>[17]</sup> were synthesized according to procedures previously described in the literature.

<sup>[10]</sup> Y. K. Chung, P. G. Williard, D. A. Sweigart, *Organometallics* 1982, **1**, 1053.

<sup>[17]</sup> a) K. Tani, L. D. Brown, J. Ahmed, J. A. Ibers, M. Yokota, A. Nakamura, S. Otsuka, *J. Am. Chem. Soc.*, 1977, **99**, 7876. b) N. K. Roberts, S. B. Wild, *J. Am. Chem. Soc.*, 1979, **101**, 6254. c) T. Mino, Y. Tanaka, Y. Hattori, T. Yabusaki, H. Saotome, M. Sakamoto, T. Fujita, *J. Org. Chem.*, 2006, **71**, 7346.

**Typical procedure for the synthesis of complexes 2, 3, 4, 5 and 6.** A solution of complex **1** (for **2**, **3** and **4**) or complex **4** (for **5** and **6**) (1 mmol) and freshly distilled TMEDA (1.6 eq) in 10 mL of THF was cooled to -78°C. A solution of *n*BuLi (1.6M in hexanes, 1.6 eq) was slowly added. The mixture was stirred for 1 hour at -78°C before the addition of the electrophile (Ph<sub>2</sub>PCl, Ph<sub>2</sub>(O)PCl, [H<sub>2</sub>C=NMe<sub>2</sub>][I] or (CH<sub>2</sub>)<sub>2</sub>I<sub>2</sub>; 2 eq). The mixture was stirred for another hour at -78°C before warming to room temperature and quenching by addition of H<sub>2</sub>O. After extraction of the mixture by Et<sub>2</sub>O, the combined organic layers were washed with a saturated aqueous sodium chloride solution and dried over magnesium sulfate. After concentration *in vacuo*, the crude mixture was purified by flash chromatography on silica gel to afford the pure functionalized η<sup>5</sup>-cyclohexadienyl complex **2**, **3**, **4**, **5** or **6**.

**2** (83%).  $^1\text{H}$  NMR (400 MHz,  $\text{CDCl}_3$ ):  $\delta$  3.35 (m, 1H,  $\text{H}^5$ ), 3.43 (s, 3H, OMe), 3.56 (m, 1H,  $\text{H}^1$ ), 4.02 ( $t_{\text{app}}$ ,  $^3J = 6.0$  Hz, 1H,  $\text{H}^6$ ), 4.39 (d,  $^3J = 7.4$  Hz, 1H,  $\text{H}^4$ ), 6.98 (d,  $^3J = 7.0$  Hz, 2H,  $\text{H}^{\text{Ar}}$ ), 7.22-7.37 (m, 9H,  $\text{H}^{\text{Ar}}$ ), 7.44-7.47 (m, 4H,  $\text{H}^{\text{Ar}}$ ).  $^{13}\text{C}$  NMR (100 MHz,  $\text{CDCl}_3$ ):  $\delta$  41.6 ( $\text{C}^6$ ), 42.3 ( $\text{C}^1$ ), 55.1 (OMe), 57.7 ( $\text{C}^5$ ), 81.2 (d,  $^1J^{\text{CP}} = 20$  Hz,  $\text{C}^3$ ), 95.7 ( $\text{C}^4$ ), 125.5 ( $\text{CH}^{\text{Ar}}$ ), 127.0 ( $\text{CH}^{\text{Ar}}$ ), 128.6 (d,  $^3J^{\text{CP}} = 7$  Hz,  $\text{CH}^{\text{Ar}}$ ), 128.8 ( $\text{CH}^{\text{Ar}}$ ), 128.9 (d,  $^3J^{\text{CP}} = 7$  Hz,  $\text{CH}^{\text{Ar}}$ ), 128.9 ( $\text{CH}^{\text{Ar}}$ ), 129.8 ( $\text{CH}^{\text{Ar}}$ ), 133.4 (d,  $^2J^{\text{CP}} = 20$  Hz,  $\text{CH}^{\text{Ar}}$ ), 135.0 (d,  $^1J^{\text{CP}} = 12$  Hz,  $\text{C}^{\text{Ar}}$ ), 135.1 (d,  $^2J^{\text{CP}} = 20$  Hz,  $\text{CH}^{\text{Ar}}$ ), 137.6 (d,  $^1J^{\text{CP}} = 12$  Hz,  $\text{C}^{\text{Ar}}$ ), 146.2 (d,  $^2J^{\text{CP}} = 14$  Hz,  $\text{C}^2$ ), 147.7 ( $\text{C}^{\text{Ar}}$ ).  $^{31}\text{P}$  NMR (161 MHz,  $\text{CDCl}_3$ ):  $\delta$  -17.2 ( $\text{PPh}_2$ ). IR (neat): 1917 ( $\text{Mn}(\text{CO})_3$ ), 2009 ( $\text{Mn}(\text{CO})_3$ ). HRMS (MALDI TOF, positive mode): 509.0266 ( $\text{M}+\text{H}^+$ , calcd for  $\text{C}_{28}\text{H}_{23}\text{MnO}_4\text{P}$ : 509.0714). Anal. Calcd for  $\text{C}_{28}\text{H}_{22}\text{MnO}_4\text{P}$ : C, 66.15 ; H, 4.36. Found: C, 66.06 ; H, 4.07.

$^{13}\text{C}$  NMR spectrum (100 MHz,  $\text{CDCl}_3$ ) of complex **2**.

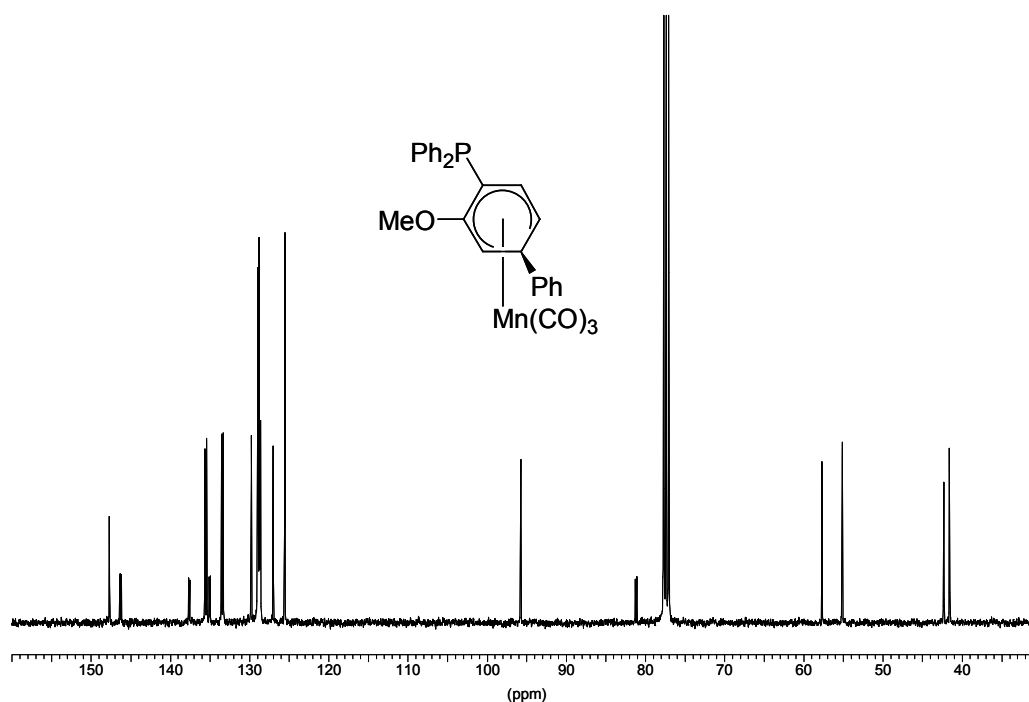

**3** (70%).  $^1\text{H}$  NMR (400 MHz,  $\text{CDCl}_3$ ):  $\delta$  3.14 (s, 3H, OMe), 3.42 ( $t_{\text{app}}$ ,  $^3J = 6.0$  Hz, 1H,  $\text{H}^1$ ), 3.63 ( $t_{\text{app}}$ ,  $^3J = 6.0$  Hz, 1H,  $\text{H}^5$ ), 4.02 (t,  $^3J = 6.0$  Hz, 1H,  $\text{H}^6$ ), 5.74 (t,  $^3J = 7.0$  Hz, 1H,  $\text{H}^4$ ), 6.97 (d,  $^3J = 7.0$  Hz, 2H,  $\text{H}^8$ ), 7.22-7.29 (m, 5H,  $\text{H}^{\text{Ar}}$ ), 7.42-7.56 (m, 4H,  $\text{H}^{\text{Ar}}$ ), 7.75-7.89 (m, 4H,  $\text{H}^{\text{Ar}}$ ).  $^{13}\text{C}$  NMR (100 MHz,  $\text{CDCl}_3$ ):  $\delta$  41.5 ( $\text{C}^6$ ), 42.7 ( $\text{C}^1$ ), 54.3 (OMe), 60.3 ( $\text{C}^5$ ), 97.3 ( $\text{C}^4$ ), 125.5 ( $\text{CH}^{\text{Ar}}$ ), 127.2 ( $\text{CH}^{\text{Ar}}$ ), 127.9 (d,  $^2J^{\text{CP}} = 12$  Hz,  $\text{CH}^{\text{Ar}}$ ), 128.6 (d,  $^2J^{\text{CP}} = 12$  Hz,  $\text{CH}^{\text{Ar}}$ ), 128.7 ( $\text{CH}^{\text{Ar}}$ ), 131.9 ( $\text{CH}^{\text{Ar}}$ ), 132.1 (d,  $^3J^{\text{CP}} = 10$  Hz,  $\text{CH}^{\text{Ar}}$ ), 132.8 ( $\text{CH}^{\text{Ar}}$ ), 147.2 ( $\text{C}^2$ ), 216.6 ( $\text{Mn}(\text{CO})_3$ ).  $^{31}\text{P}$  NMR ( $\text{CDCl}_3$ ):  $\delta$  30.3. IR (neat): 1952 ( $\text{Mn}(\text{CO})_3$ ), 2015 ( $\text{Mn}(\text{CO})_3$ ). HRMS (ESI, positive mode): 525.0658 ( $\text{M}+\text{H}^+$ , calcd for  $\text{C}_{28}\text{H}_{23}\text{O}_5\text{MnP}$ : 525.0664).

$^{13}\text{C}$  NMR spectrum (100 MHz,  $\text{CDCl}_3$ ) of complex **3**.

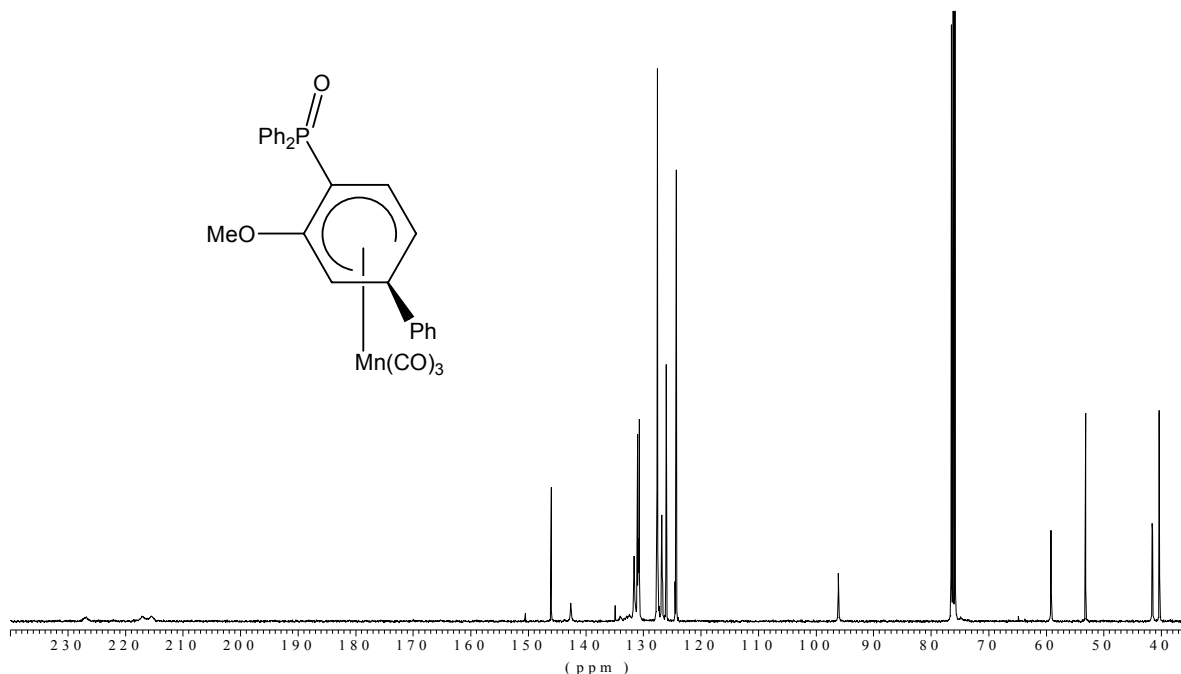

**4** (73%).  $^1\text{H}$  NMR (400 MHz,  $\text{CDCl}_3$ ):  $\delta$  2.41 (s, 6H,  $\text{NMe}_2$ ), 3.06 (d,  $^2J = 12.5$  Hz, 1H,  $\text{H}^{11}$ ), 3.31 (ddd,  $^3J = 7.3$  Hz,  $^3J = 6.2$  Hz,  $^4J = 1.6$  Hz, 1H,  $\text{H}^5$ ), 3.40 (dd,  $^3J = 6.2$  Hz,  $^4J = 1.6$  Hz, 1H,  $\text{H}^1$ ), 3.42 (s, 3H, OMe), 3.91 ( $t_{\text{app}}$ ,  $^3J = 6.2$  Hz, 1H,  $\text{H}^6$ ), 4.21 (d,  $^2J = 12.5$  Hz, 1H,  $\text{H}^{11}$ ), 5.05 (d,  $^3J = 7.3$  Hz, 1H,  $\text{H}^4$ ), 6.94 (d,  $^3J = 7.3$  Hz, 2H,  $\text{H}^{\text{Ar}}$ ), 7.13 (t,  $^3J = 7.3$  Hz, 1H,  $\text{H}^{\text{Ar}}$ ), 7.21 ( $t_{\text{app}}$ ,  $^3J = 7.3$  Hz, 2H,  $\text{H}^{\text{Ar}}$ ).  $^{13}\text{C}$  NMR (100 MHz,  $\text{CDCl}_3$ ):  $\delta$  41.5 ( $\text{C}^1$ ), 42.6 ( $\text{C}^6$ ), 45.5 ( $\text{NMe}_2$ ), 54.8 (OMe), 56.2 ( $\text{C}^5$ ), 59.0 ( $\text{C}^{11}$ ), 85.3 ( $\text{C}^3$ ), 97.2 ( $\text{C}^4$ ), 125.6 ( $\text{CH}^{\text{Ar}}$ ), 127.0 ( $\text{CH}^{\text{Ar}}$ ), 128.8 ( $\text{CH}^{\text{Ar}}$ ), 143.4 ( $\text{C}^2$  or  $\text{C}^{\text{Ar}}$ ), 147.5 ( $\text{C}^2$  or  $\text{C}^{\text{Ar}}$ ), 222.9 ( $\text{Mn}(\text{CO})_3$ ). IR (neat): 1909 ( $\text{Mn}(\text{CO})_3$ ), 2006 ( $\text{Mn}(\text{CO})_3$ ). HRMS (MALDI TOF, positive mode): 382.0798 ( $\text{M}+\text{H}^+$ , calcd for  $\text{C}_{19}\text{H}_{21}\text{O}_4\text{MnN}$ : 382.0851).

$^{13}\text{C}$  NMR spectrum (100 MHz,  $\text{CDCl}_3$ ) of complex **4**.

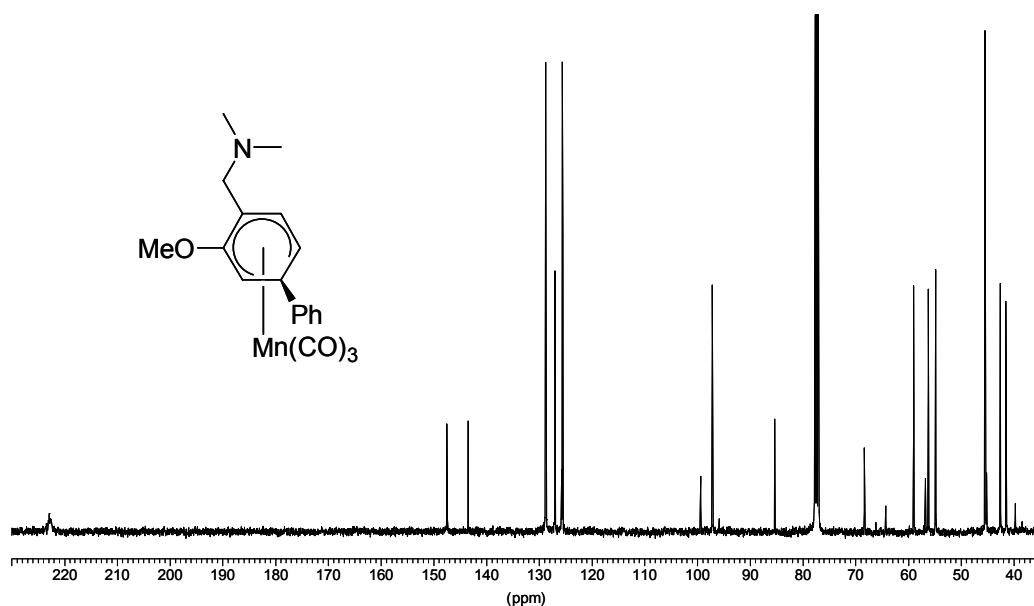

**5** (94%).  $^1\text{H}$  NMR (400 MHz,  $\text{CDCl}_3$ ):  $\delta$  2.44 (s, 6H,  $\text{NMe}_2$ ), 3.39 (s, 3H, OMe), 3.49 (d,  $^3J = 6.1$  Hz, 1H,  $\text{H}^1$ ), 3.59 (d,  $^2J = 12.8$  Hz, 1H,  $\text{H}^{11}$ ), 3.84 (m, 2H,  $\text{H}^5$  and  $\text{H}^6$ ), 4.14 (d,  $^2J = 12.8$  Hz, 1H,  $\text{H}^{11}$ ), 6.92 (d,  $^3J = 7.5$  Hz, 2H,  $\text{H}^{\text{Ar}}$ ), 7.15 (t,  $^3J = 7.3$  Hz, 1H,  $\text{H}^{\text{Ar}}$ ), 7.23 (t,  $^3J = 7.7$  Hz, 2H,  $\text{H}^{\text{Ar}}$ ).  $^{13}\text{C}$  NMR (100 MHz,  $\text{CDCl}_3$ ):  $\delta$  43.8 ( $\text{C}^1$ ), 45.5 ( $\text{C}^6$ ), 45.6 ( $\text{NMe}_2$ ), 55.3 (OMe), 60.7 ( $\text{C}^{11}$ ), 65.6 ( $\text{C}^5$ ), 78.9 ( $\text{C}^3$  or  $\text{C}^4$ ), 88.5 ( $\text{C}^3$  or  $\text{C}^4$ ), 125.6 ( $\text{CH}^{\text{Ar}}$ ), 127.3 ( $\text{CH}^{\text{Ar}}$ ), 128.9 ( $\text{CH}^{\text{Ar}}$ ), 139.2 ( $\text{C}^{\text{Ar}}$ ), 146.9 ( $\text{C}^2$ ). IR (neat): 1910 ( $\text{Mn}(\text{CO})_3$ ), 2022 ( $\text{Mn}(\text{CO})_3$ ). HRMS (ESI, positive mode): 507.9812 ( $\text{M} + \text{H}^+$ , calcd for  $\text{C}_{19}\text{H}_{20}\text{IMnNO}_4$ : 507.9818).

$^{13}\text{C}$  NMR spectrum (100 MHz,  $\text{CDCl}_3$ ) of complex **5**.

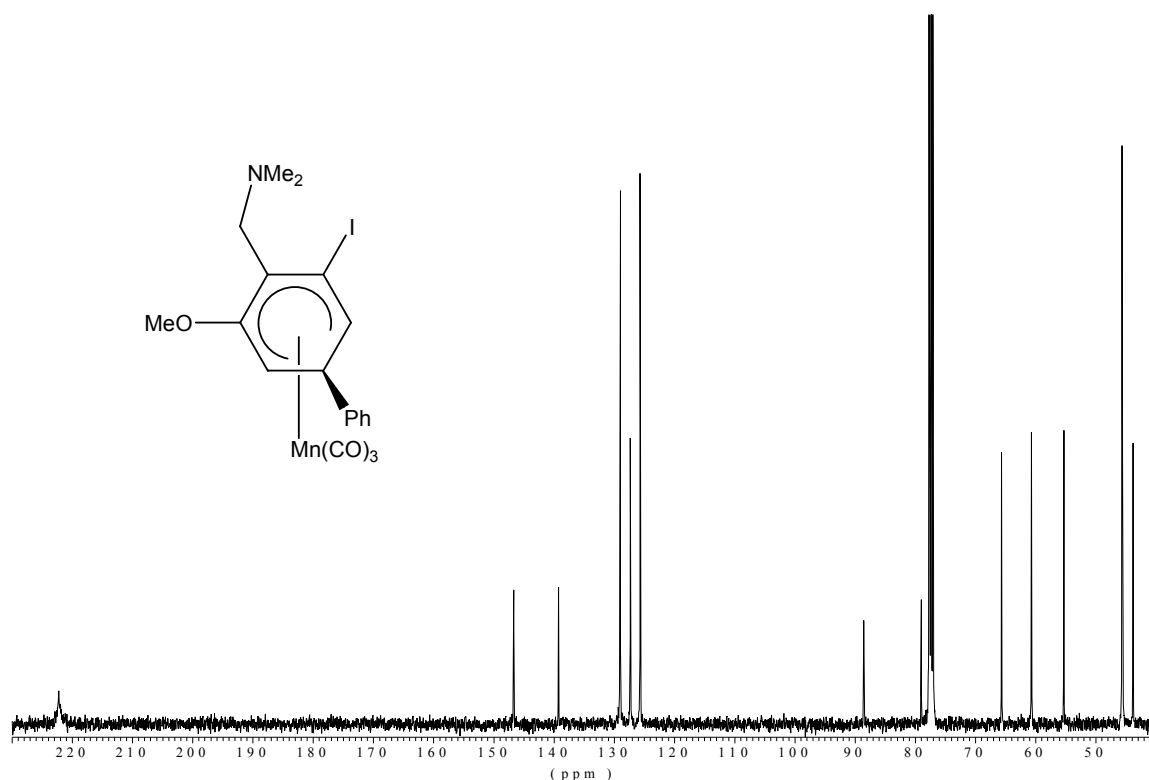

**6** (76%).  $^1\text{H}$  NMR (400 MHz,  $\text{CDCl}_3$ ):  $\delta$  1.92 (s, 6H,  $\text{NMe}_2$ ), 3.19 (d,  $^3J = 6.1$  Hz, 1H,  $\text{H}^5$ ), 3.28 (dd,  $^3J = 5.0$  Hz,  $^4J = 1.3$  Hz, 1H,  $\text{H}^1$ ), 3.61 (s, 3H, OMe), 3.83 (d,  $^2J = 12.7$  Hz, 1H,  $\text{H}^{11}$ ), 3.97 (t,  $^3J = 6.0$  Hz, 1H,  $\text{H}^6$ ), 4.14 (dd,  $^2J = 12.7$  Hz,  $J = 4.1$  Hz, 1H,  $\text{H}^{11}$ ), 6.81 (t,  $^3J = 7.6$  Hz, 2H,  $\text{H}^{\text{Ar}}$ ), 6.89 (t,  $^3J = 7.1$  Hz, 2H,  $\text{H}^{\text{Ar}}$ ), 6.95 (d,  $^3J = 7.2$  Hz, 2H,  $\text{H}^{\text{Ar}}$ ), 7.10 (t,  $^3J = 7.1$  Hz, 1H,  $\text{H}^{\text{Ar}}$ ), 7.20-7.37 (m, 8H,  $\text{H}^{\text{Ar}}$ ).  $^{13}\text{C}$  NMR (100 MHz,  $\text{CDCl}_3$ ):  $\delta$  37.7 ( $\text{C}^1$ ), 42.4 ( $\text{C}^6$ ), 43.9 ( $\text{NMe}_2$ ), 54.6 (d,  $^3J^{\text{CP}} = 13.7$  Hz,  $\text{C}^{11}$ ), 55.0 (OMe), 61.5 (d,  $^2J^{\text{CP}} = 5$  Hz,  $\text{C}^5$ ), 91.3 (d,  $J^{\text{CP}} = 21$  Hz,  $\text{C}^3$  or  $\text{C}^4$ ), 109.5 (d,  $J^{\text{CP}} = 23$  Hz,  $\text{C}^3$  or  $\text{C}^4$ ), 125.6 ( $\text{CH}^{\text{Ar}}$ ), 127.0 ( $\text{CH}^{\text{Ar}}$ ), 127.7 (d,  $^3J^{\text{CP}} = 8$  Hz,  $\text{CH}^{\text{Ar}}$ ), 127.9 ( $\text{CH}^{\text{Ar}}$ ), 128.6 (d,  $^3J^{\text{CP}} = 12$  Hz,  $\text{CH}^{\text{Ar}}$ ), 129.0 ( $\text{CH}^{\text{Ar}}$ ), 129.5 ( $\text{CH}^{\text{Ar}}$ ), 132.9 (d,  $^2J^{\text{CP}} = 16$  Hz,  $\text{CH}^{\text{Ar}}$ ), 134.8 ( $\text{C}^{\text{Ar}}$ ), 136.1 (d,  $^2J^{\text{CP}} = 20$  Hz,  $\text{C}^{\text{Ar}}$ ), 143.6 (d,  $^3J^{\text{CP}} = 5$  Hz,  $\text{C}^2$ ), 147.1 ( $\text{C}^{\text{Ar}}$ ), 222.4 ( $\text{Mn}(\text{CO})_3$ ).  $^{31}\text{P}$  NMR (161 MHz,  $\text{CDCl}_3$ ):  $\delta$  -9.2 ( $\text{PPh}_2$ ). IR (neat): 1925 ( $\text{Mn}(\text{CO})_3$ ), 2010 ( $\text{Mn}(\text{CO})_3$ ). HRMS (ESI, positive mode): 566.1287 ( $\text{M}+\text{H}^+$ , calcd for  $\text{C}_{31}\text{H}_{30}\text{O}_4\text{MnNP}$  : 566.1293).

$^{13}\text{C}$  NMR spectrum (100 MHz,  $\text{CDCl}_3$ ) of complex **6**.

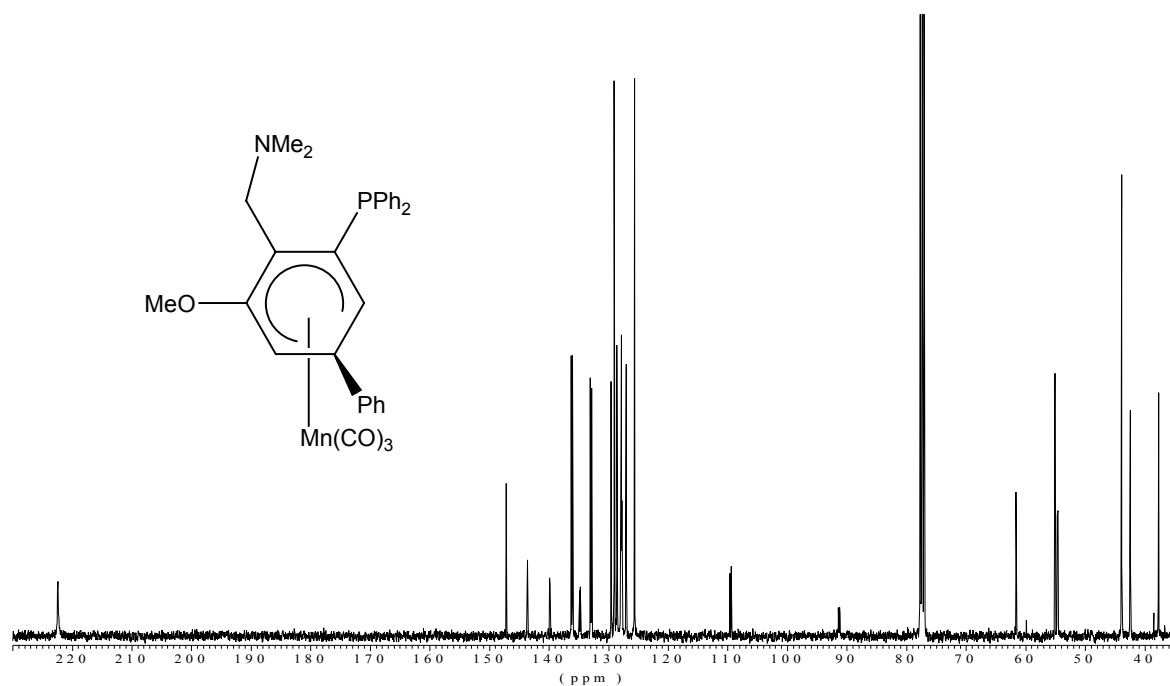

**Preparation of complex 7 ((2)Pd(allyl)Cl).** In a glove box, the dimeric complex  $[(\text{allyl})\text{PdCl}]_2$  (0,20 mmol, 1eq) was introduced in a Schlenck tube. Then, under  $\text{N}_2$ , complex **2** (0,42 mmol, 2,1 eq) was added. At  $-78^\circ\text{C}$ ,  $\text{Et}_2\text{O}$  (5 mL) was added and the mixture was stirred for 30 minutes at  $-78^\circ\text{C}$  before warming slowly to room temperature. After concentration *in vacuo*, the crude mixture was washed with pentane and filtered. The palladium complex **7** was isolated in 63% yield as a cream powder.

$^1\text{H}$  NMR (400MHz,  $\text{CDCl}_3$ ):  $\delta$  2.78 (d,  $J = 12.1$  Hz, 1H, allyl), 3.02 (s, 3H, OMe), 3.05 (m, 1H), 3.07 (s, 3H, OMe), 3.16 (m, 1H), 3.35 (m, 1H), 3.47 (m, 2H), 3.56-3.76 (m, 4H), 4.01 (m, 2H), 4.72 (m, 2H), 5.56 (m, 2H), 6.06 (m, 1H), 6.24 (m, 1H), 7.00-7.06 (m, 4H,  $\text{H}^{\text{Ar}}$ ), 7.20-7.43 (m, 18H,  $\text{H}^{\text{Ar}}$ ), 7.65-7.77 (m, 8H,  $\text{H}^{\text{Ar}}$ ).  $^{31}\text{P}$  NMR (161 MHz,  $\text{CDCl}_3$ ):  $\delta$  24.6, 25.4. IR (neat): 1926 ( $\text{Mn}(\text{CO})_3$ ), 2015 ( $\text{Mn}(\text{CO})_3$ ). HRMS (MALDI TOF, positive mode): 655.0125 (M-Cl, calcd for  $\text{C}_{31}\text{H}_{27}\text{MnO}_4\text{PPd}$ : 655.0062).

### Resolution procedure of racemic complex ( $\pm$ )-**2**:

#### Synthesis and separation of diastereoisomeric complexes (*S*,6*R*,3*pR*)-**8** and (*S*,6*S*,3*pS*)-**8**:

A mixture of ( $\pm$ )-**2** (0.200 g, 0.4 mmol) and (*S*)-(+)-di- $\mu$ -chlorobis[2-[(dimethylamino)ethyl]phenyl- $C^2,N$ ]dipalladium(II) (0.116 g, 0.2 mmol) in toluene (3.0 mL)

was stirred at room temperature for 1h. After concentration *in vacuo*, the crude mixture was purified by flash chromatography on silica gel to separate the diastereoisomeric mixture of (*S*,*6R*,*3pR*)-**8** and (*S*,*6S*,*3pS*)-**8**.

(*S*,*6R*,*3pR*)-**8** (34%). de = 95%.  $R_f = 0.66$  (Et<sub>2</sub>O).  $[\alpha]_D^{20} +45$  ( $c$  0.23, CHCl<sub>3</sub>). <sup>1</sup>H NMR (CDCl<sub>3</sub>):  $\delta$  1.84 (d, <sup>3</sup> $J = 6.6$  Hz, 3H, H<sup>26</sup>), 2.69 (s, 3H, NMe), 2.76 (s, 3H, NMe), 2.89 (s, 3H, OMe), 3.36 (d, <sup>3</sup> $J = 6.4$  Hz, 1H, H<sup>1</sup>), 3.47 (t, <sup>3</sup> $J = 7.1$  Hz, 1H, H<sup>5</sup>), 3.75 (t, <sup>3</sup> $J = 5.7$  Hz, 1H, H<sup>25</sup>), 3.95 (t, <sup>3</sup> $J = 5.9$  Hz, 1H, H<sup>6</sup>), 6.39-6.46 (m, 2H, H<sup>Ar</sup>), 6.52 (t, <sup>3</sup> $J = 7.8$  Hz, 1H, H<sup>4</sup>), 6.84 (t, <sup>3</sup> $J = 7.6$  Hz, 1H, H<sup>Ar</sup>), 6.93 (d, <sup>3</sup> $J = 7.0$  Hz, 1H, H<sup>Ar</sup>), 7.15-7.43 (m, 11H, H<sup>Ar</sup>), 7.65 (dd, <sup>3</sup> $J = 7.4$  Hz, <sup>3</sup> $J = 12.0$ , 2H, H<sup>Ar</sup>), 7.80 (dd, <sup>3</sup> $J = 7.3$  Hz, <sup>3</sup> $J = 11.9$  Hz, 2H, H<sup>Ar</sup>). <sup>13</sup>C NMR (100 MHz, CDCl<sub>3</sub>):  $\delta$  21.7 (C<sup>26</sup>), 41.5 (C<sup>6</sup>), 43.1 (C<sup>1</sup>), 46.9 (NMe), 50.6 (NMe), 54.0 (OMe), 57.9 (d, <sup>3</sup> $J^{CP} = 10$  Hz, C<sup>5</sup>), 76.0 (C<sup>25</sup>), 80.1 (d, <sup>1</sup> $J^{CP} = 47$  Hz, C<sup>3</sup>), 105.3 (d, <sup>2</sup> $J^{CP} = 22$  Hz, C<sup>4</sup>), 122.4 (CH<sup>Ar</sup>), 124.2 (CH<sup>Ar</sup>), 125.4 (d, <sup>3</sup> $J^{CP} = 5$  Hz, CH<sup>Ar</sup>), 126.4 (CH<sup>Ar</sup>), 126.9 (d, <sup>2</sup> $J^{CP} = 12$  Hz, CH<sup>Ar</sup>), 127.2 (CH<sup>Ar</sup>), 128.3 (d, <sup>2</sup> $J^{CP} = 11$  Hz, CH<sup>Ar</sup>), 128.9 (CH<sup>Ar</sup>), 130.3 (d, <sup>3</sup> $J^{CP} = 8$  Hz, CH<sup>Ar</sup>), 133.4 (d, <sup>2</sup> $J^{CP} = 11$  Hz, CH<sup>Ar</sup>), 134.0 (C<sup>Ar</sup>), 134.5 (C<sup>Ar</sup>), 136.2 (d, <sup>2</sup> $J^{CP} = 11$  Hz, CH<sup>Ar</sup>), 137.6 (d, <sup>3</sup> $J^{CP} = 8$  Hz, CH<sup>Ar</sup>), 144.9 (C<sup>2</sup>), 147.1 (C<sup>Ar</sup>), 152.9 (C<sup>Ar</sup>), 154.6 (C<sup>Ar</sup>). <sup>31</sup>P NMR (161 MHz, CDCl<sub>3</sub>):  $\delta$  39.0 (PPh<sub>2</sub>). IR (neat): 1925 (Mn(CO)<sub>3</sub>), 2014 (Mn(CO)<sub>3</sub>). HRMS (ESI, positive mode): 798.0568 (M+H<sup>+</sup>, Calcd for: C<sub>38</sub>H<sub>37</sub>O<sub>4</sub>ClMnNPPd: 798.0564).

<sup>13</sup>C NMR spectrum (100 MHz, CDCl<sub>3</sub>) of complex (*S*,*6R*,*3pR*)-**8**.

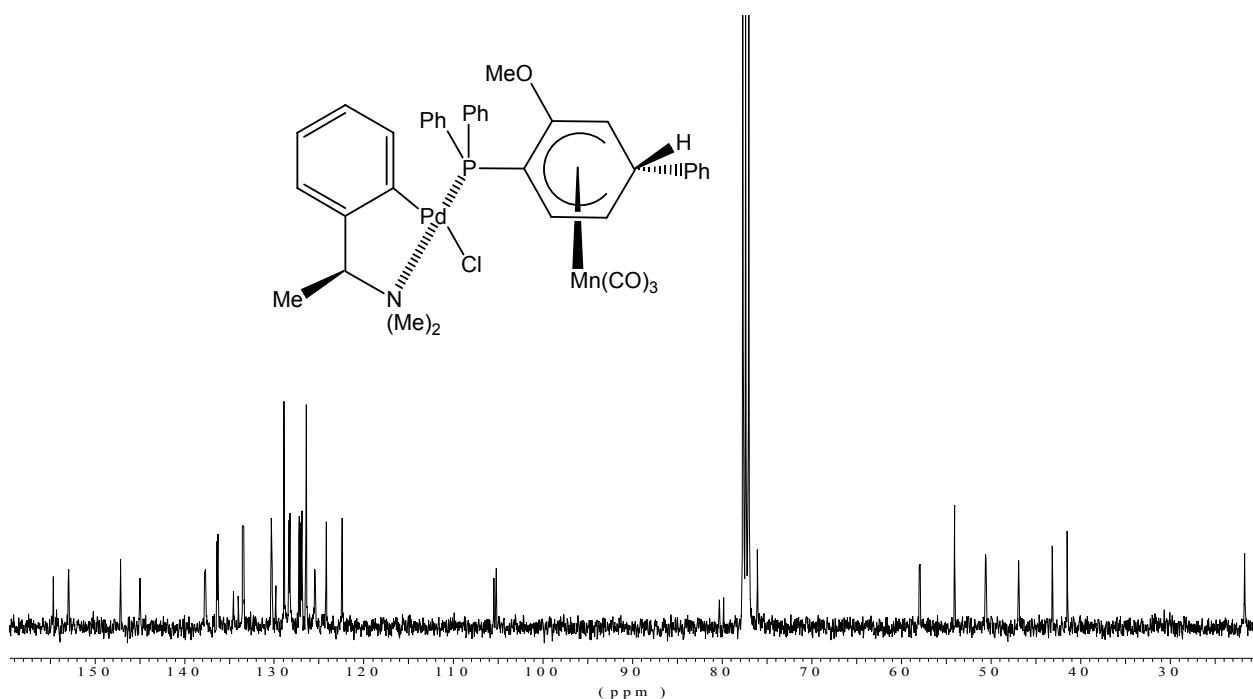



(*S,6S,3pS*)-**8** (36%). de = 95%.  $R_f = 0.50$  (Et<sub>2</sub>O).  $[\alpha]_D^{20} -50$  (c 0.21, CHCl<sub>3</sub>). <sup>1</sup>H NMR (400 MHz, CDCl<sub>3</sub>):  $\delta$  1.79 (d, <sup>3</sup> $J = 6.4$  Hz, 3H, H<sup>26</sup>), 2.72 (s, 6H, NMe<sub>2</sub>), 2.99 (s, 3H, OMe), 3.29 (t<sub>app</sub>, <sup>3</sup> $J = 6.5$  Hz, H<sup>5</sup>), 3.37 (d, <sup>3</sup> $J = 5.9$  Hz, 1H, H<sup>1</sup>), 3.79 (t, <sup>3</sup> $J = 5.8$  Hz, 1H, H<sup>25</sup>), 3.93 (t, <sup>3</sup> $J = 6.0$  Hz, 1H, H<sup>6</sup>), 5.91 (t, <sup>3</sup> $J = 7.8$  Hz, 1H, H<sup>4</sup>), 6.46 (t, <sup>3</sup> $J = 7.2$  Hz, 1H, H<sup>Ar</sup>), 6.59 (t, <sup>3</sup> $J = 6.8$  Hz, 1H, H<sup>Ar</sup>), 6.84 (t, <sup>3</sup> $J = 7.2$  Hz, 1H, H<sup>Ar</sup>), 6.93 (d, <sup>3</sup> $J = 6.8$  Hz, 1H, H<sup>Ar</sup>), 7.08 (d, <sup>3</sup> $J = 7.2$  Hz, 2H, H<sup>Ar</sup>), 7.22-7.27 (m, 4H, H<sup>Ar</sup>), 7.32-7.37 (m, 4H, H<sup>Ar</sup>), 7.44 (d, <sup>3</sup> $J = 6.8$  Hz, 1H, H<sup>Ar</sup>), 7.72 (dd, <sup>3</sup> $J = 7.0$  Hz, <sup>3</sup> $J = 11.9$  Hz, 2H, H<sup>Ar</sup>), 7.95 (dd, <sup>3</sup> $J = 7.4$  Hz, <sup>3</sup> $J = 11.5$  Hz, 2H, H<sup>Ar</sup>). <sup>13</sup>C NMR (100 MHz, CDCl<sub>3</sub>):  $\delta$  21.1 (C<sup>26</sup>), 40.9 (C<sup>6</sup>), 41.9 (C<sup>1</sup>), 46.6 (NMe), 50.4 (NMe), 54.0 (OMe), 58.0 (d, <sup>3</sup> $J^{CP} = 10.3$  Hz, C<sup>5</sup>), 75.7 (C<sup>25</sup>), 78.6 (d, <sup>1</sup> $J^{CP} = 46$  Hz, C<sup>3</sup>), 103.6 (d, <sup>2</sup> $J^{CP} = 10.3$  Hz, C<sup>4</sup>), 122.6 (CH<sup>Ar</sup>), 124.3 (CH<sup>Ar</sup>), 125.7 (d, <sup>3</sup> $J^{CP} = 5.1$  Hz, CH<sup>Ar</sup>), 125.9 (CH<sup>Ar</sup>), 126.8 (d, <sup>2</sup> $J^{CP} = 12$  Hz, CH<sup>Ar</sup>), 127.2 (CH<sup>Ar</sup>), 128.4 (d, <sup>2</sup> $J^{CP} = 10.3$  Hz, CH<sup>Ar</sup>), 128.7 (CH<sup>Ar</sup>), 128.9 (d, <sup>3</sup> $J^{CP} = 5.1$  Hz, CH<sup>Ar</sup>), 129.9 (d, <sup>3</sup> $J^{CP} = 2.6$  Hz, CH<sup>Ar</sup>), 130.4 (d, <sup>3</sup> $J^{CP} = 2.6$  Hz, CH<sup>Ar</sup>), 134.2 (d, <sup>2</sup> $J^{CP} = 12$  Hz, CH<sup>Ar</sup>), 135.8 (d, <sup>2</sup> $J^{CP} = 12$  Hz, CH<sup>Ar</sup>), 137.0 (d, <sup>2</sup> $J^{CP} = 10.3$ , CH<sup>Ar</sup>), 145.5 (C<sup>2</sup>), 147.2 (C<sup>Ar</sup>), 151.7 (C<sup>Ar</sup>), 154.4 (C<sup>Ar</sup>). <sup>31</sup>P NMR (161 MHz, CDCl<sub>3</sub>):  $\delta$  39.0 (PPh<sub>2</sub>). IR (neat): 1920 (Mn(CO)<sub>3</sub>), 2011 (Mn(CO)<sub>3</sub>). HRMS (ESI, positive mode): 798.0596 (M+H<sup>+</sup>, Calcd for: C<sub>38</sub>H<sub>37</sub>O<sub>4</sub>ClMnNPPd: 798.0564).

<sup>13</sup>C NMR spectrum (100 MHz, CDCl<sub>3</sub>) of complex (*S,6S,3pS*)-**8**.

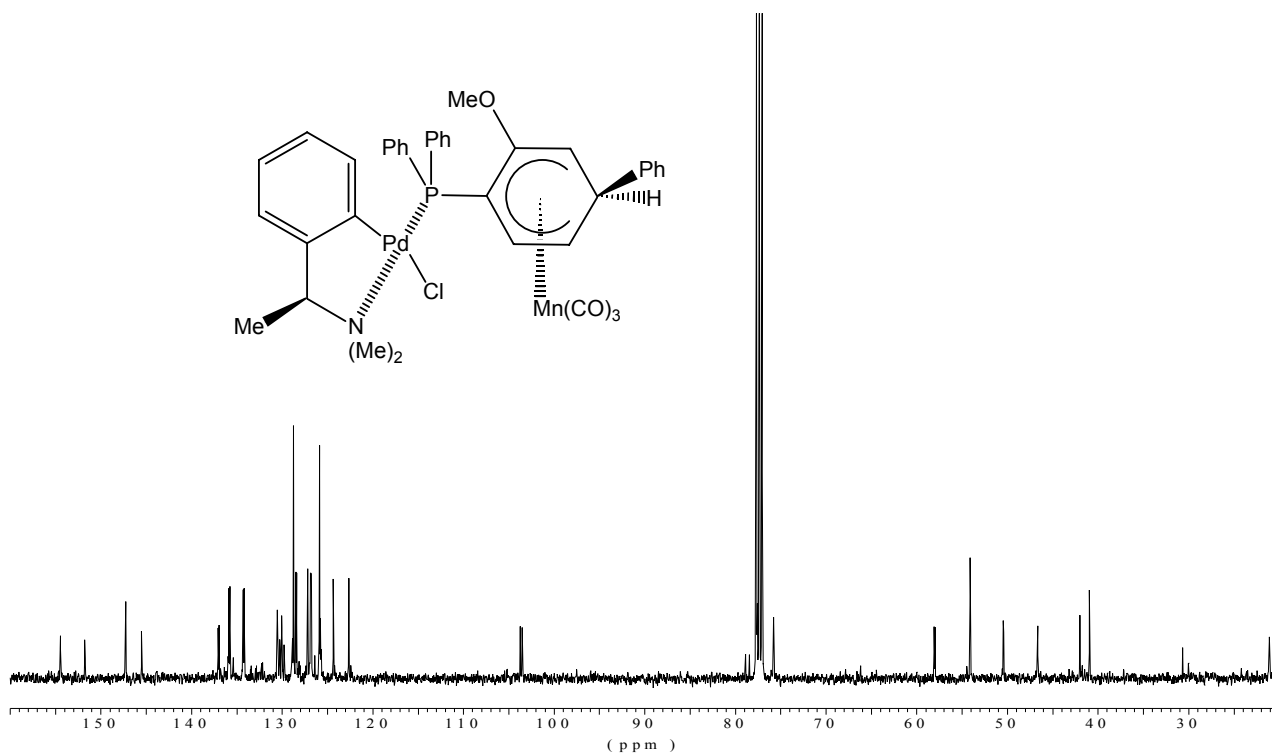

**Decomplexation of (*S*,6*S*,3*pS*)-**8** and (*S*,6*R*,3*pR*)-**8**:**

To an individual diastereoisomer (*S*,6*S*,3*pS*)-**8** and (*S*,6*R*,3*pR*)-**8** (0.1 mmol) was added a 0.1 M solution of ethylenediamine in chloroform (2 mL, 0.2 mmol) at room temperature and the mixture was stirred for 10 min. After concentration *in vacuo*, the crude mixture was purified by flash chromatography on silica gel to afford the enantiopure (*6S*,3*pS*)-**2** or (*6R*,3*pR*)-**2**.

(*6S*,3*pS*)-**2** (77%).  $[\alpha]_{\text{D}}^{20} = +57$  (c 0.21, CHCl<sub>3</sub>)

(*6R*,3*pR*)-**2** (84%).  $[\alpha]_{\text{D}}^{20} = -58$  (c 0.21, CHCl<sub>3</sub>)
